# Supplementary material for: The Heat Shock Protein 90 (HSP90) Is Required for the IL-33-Induced Cytokine Production in Mast Cells (MCs)
Source: MDPI journal article supplement (doi:10.3390/ijms231810855), 2022-09-17
Supplement: s1 [file s1]

## Supplementary Figures:

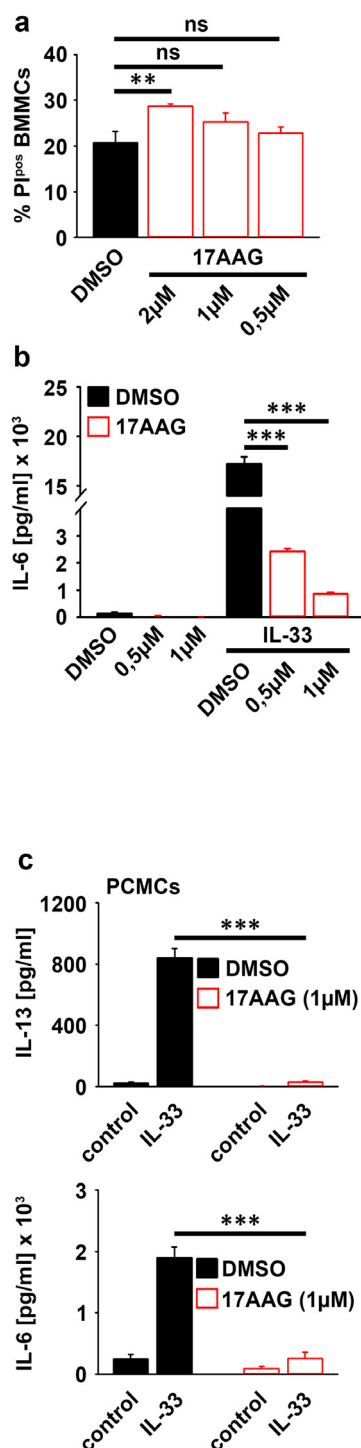

**Figure S1.** HSP90 mediates the IL-33-induced cytokine production. **(a)** BMMCs treated were with DMSO (vehicle) or 17AAG as indicated. Cells were analyzed by flow cytometry for PI<sup>pos</sup> cells (the summary of  $n=3$  biological replicates is shown, unpaired students  $t$ -test; ns: not significant,  $** p \leq 0.01$ ). **(b)** BMMCs were treated with DMSO (vehicle) or 17AAG as indicated and were stimulated with IL-33 (50ng/ml) for 24h. Supernatants were collected and analyzed by ELISA (the summary of  $n=3$  biological replicates is shown, unpaired students  $t$ -test;  $*** p \leq 0.001$ ). **(c)** PCMCs were treated with DMSO (vehicle) or 17AAG (1μM) and were stimulated with IL-33 (50ng/ml) for 24h. Supernatants were collected and analyzed by ELISA (the summary of  $n=3$  biological replicates is shown, unpaired students  $t$ -test;  $*** p \leq 0.001$ ).

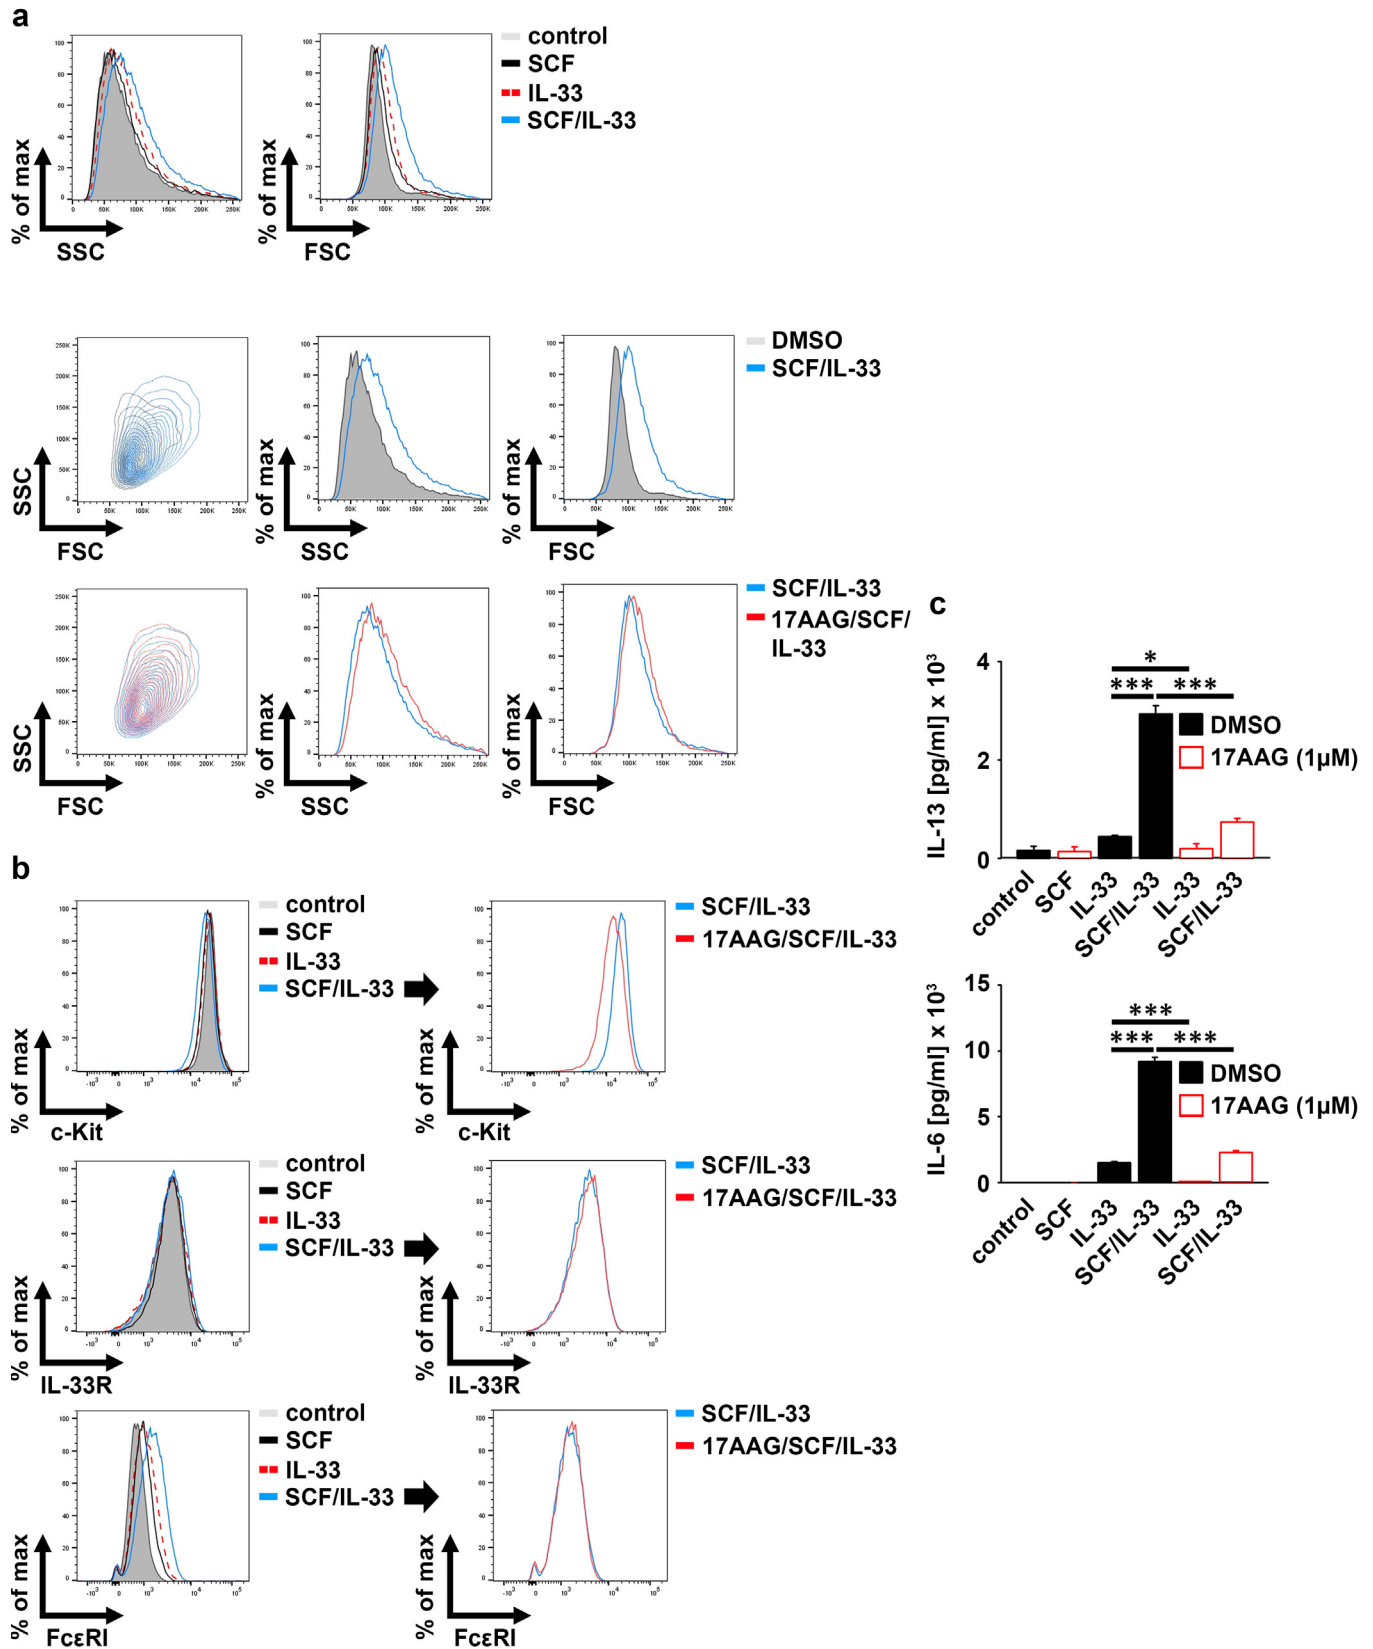

**Figure S2.** HSP90 mediates the SCF-supported and IL-33-induced cytokine production. **(a, b)** BMDCs treated with DMSO (vehicle) or 17AAG (1μM). Cells were stimulated with SCF or IL-33 or both together (both 50ng/ml) for 24h. Cells were analyzed by flow cytometry (representative experiments is shown). **(c)** BMDCs were treated with DMSO (vehicle) or 17AAG (1μM) and were stimulated with SCF or IL-33 or both together (both 50ng/ml) for 24h. Supernatants were collected and analyzed by ELISA (the summary of n=3 biological replicates is shown, unpaired students *t*-test; \* *p* ≤ 0.05, \*\*\* *p* ≤ 0.001).

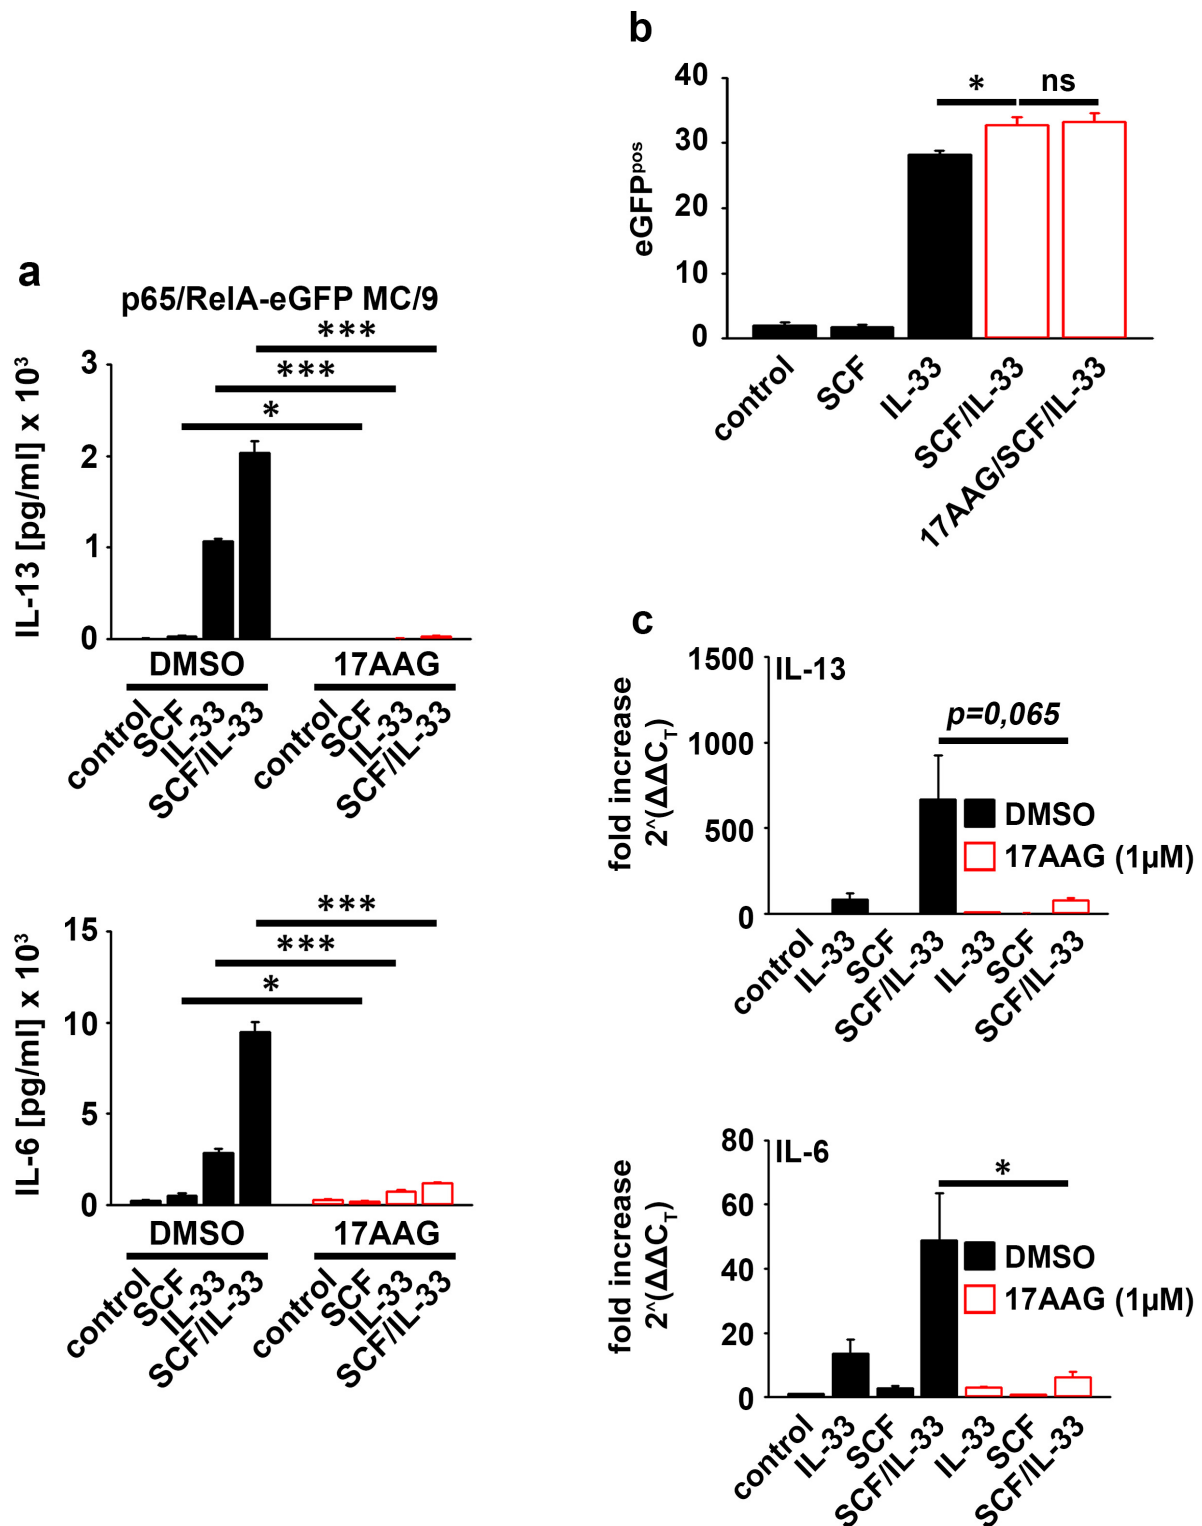

**Figure S3.** HSP90 mediates cytokine transcript stability. **(a)** P65/RelA-eGFP MCs were treated with DMSO (vehicle) or 17AAG (1 $\mu$ M). Afterwards, cells were stimulated with SCF or IL-33 or both together (both 50ng/ml) for 24h. Supernatants were collected and analyzed by ELISA (the summary of  $n=3$  replicates is shown, unpaired students  $t$ -test; \*  $p \leq 0.05$ , \*\*\*  $p \leq 0.001$ ). **(b)** P65-eGFP MCs were treated with DMSO (vehicle) or 17AAG (1 $\mu$ M). Cells were stimulated with SCF or IL-33 or both together (both 50ng/ml) for 24h. Cells were analyzed by flow cytometry for eGFP expression (the summary of  $n=3$  replicates is shown, ns not significant, unpaired students  $t$ -test; \*  $p \leq 0.05$ ). **(c)** BMSCs were treated with DMSO (vehicle) or 17AAG (1 $\mu$ M) and were stimulated with SCF or IL-33 or both together (50ng/ml) for 6h. Cells were harvested and analyzed by qPCR (the summary of  $n=3$  biological replicates is shown, unpaired students  $t$ -test; \*  $p \leq 0.05$ ).
